# Supplementary material for: An efficient and stable hybrid organic light-emitting device based on an inorganic metal oxide hole transport layer and an electron transport layer
Source: Royal Society of Chemistry journal article supplement (doi:10.1039/c8tc06135a), 2019-01-01
Supplement: c8tc06135a1.pdf [file c8tc06135a1.pdf]

## *Supporting Information*

### **Efficient and stable hybrid organic light-emitting device based on inorganic metal oxide hole transport layer and electron transport layer**

Jiaxin Zhang, Xiang Zhang, Haiwei Feng, Ziwei Yu, Jiaming Zhang, Shihao Liu, Letian Zhang\*, Wenfa Xie\*

State Key Laboratory of Integrated Optoelectronics, College of Electronic Science and Engineering, Jilin University, Changchun, 130012, People's Republic of China.

E-mail: zlt@jlu.edu.cn, xiewf@jlu.edu.cn

**Table S1. The turn-on voltages and efficiencies of HyOLEDs with different thicknesses of MoO<sub>3</sub>.**

| the thickness of MoO <sub>3</sub> (nm) | V <sub>on</sub> (V) | Maximum Current Efficiency (cd/A) | Maximum Power Efficiency (lm/W) |
|----------------------------------------|---------------------|-----------------------------------|---------------------------------|
| 3                                      | 2.84                | 27.09                             | 23.08                           |
| 10                                     | 2.77                | 12.97                             | 8.20                            |
| 20                                     | 2.89                | 17.59                             | 13.82                           |
| 30                                     | 2.86                | 12.76                             | 8.36                            |
| 40                                     | 2.98                | 6.40                              | 3.76                            |
| 50                                     | 2.90                | 9.56                              | 8.49                            |
| 60                                     | 3.15                | 4.04                              | 3.63                            |
| 70                                     | 2.98                | 4.36                              | 3.42                            |
| 80                                     | 2.96                | 13.01                             | 10.90                           |
| 90                                     | 2.98                | 28.26                             | 27.33                           |
| 100                                    | 3.09                | 54.91                             | 42.72                           |
| 105                                    | 2.65                | 60.87                             | 58.84                           |
| 110                                    | 3.30                | 40.51                             | 33.95                           |
| 120                                    | 3.09                | 48.13                             | 43.21                           |

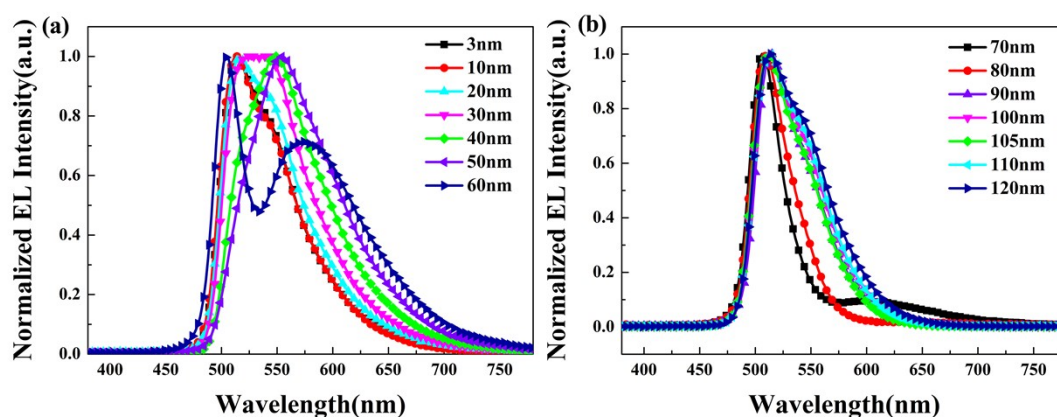

**Figure S1. The spectra of HyOLEDs with different thicknesses of MoO<sub>3</sub>.**

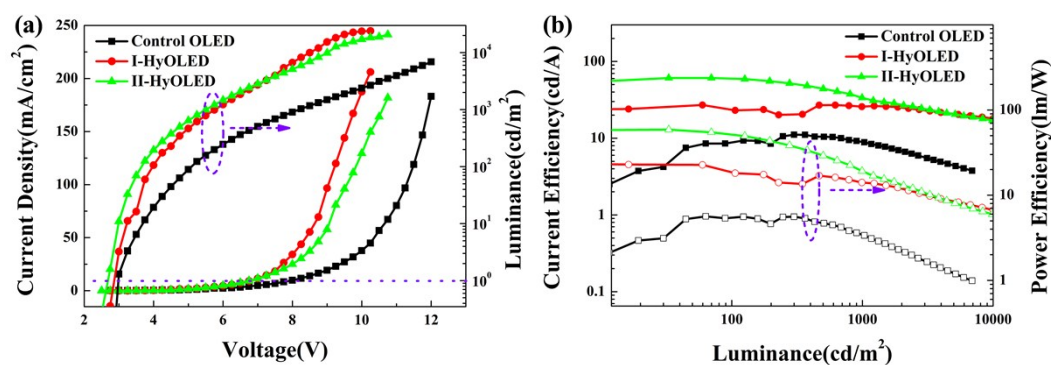

**Figure S2. (a) The current density-voltage-luminance characteristics and (b) the current efficiency-luminance-power efficiency characteristics of Control OLED, I-HyOLED and II-HyOLED. The structure of the control device: ITO / ZnO / PEI / DMAC-BPP (10nm) / CBP:Ir(ppy)<sub>3</sub> (10:1 20nm) / TcTa (10nm) / TAPC (145nm) / MoO<sub>3</sub> (3nm) / Ag (120nm).**

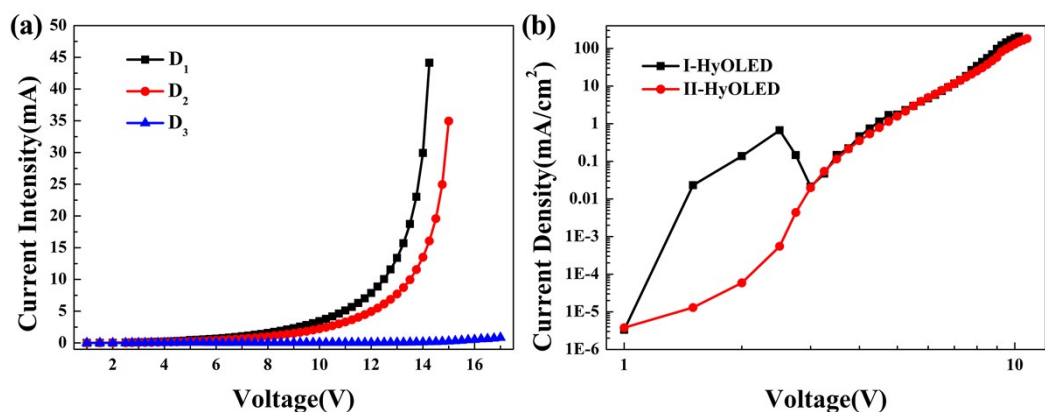

**Figure S3. (a) The current intensity of single-carrier devices D1, D2 and D3. (b) The current density-voltage characteristics of I-HyOLED and II-HyOLED. The structures of single-carrier devices: D<sub>1</sub>: ITO / TAPC (50nm) / CBP:Ir(ppy)<sub>3</sub> (10:1 20nm) / TcTa (10nm) / TAPC (40nm) / MoO<sub>3</sub> (3nm) / Ag(120nm), D<sub>2</sub>: ITO / TAPC (50nm) / CBP:Ir(ppy)<sub>3</sub> (10:1 20nm) / TcTa (10nm) / TAPC (40nm) / MoO<sub>3</sub> (105nm) / Ag(120 nm) and D<sub>3</sub>: ITO / TAPC (50nm) / CBP:Ir(ppy)<sub>3</sub> (10:1 20nm) / TcTa (10nm) / TAPC (145nm) / Ag(120nm).**

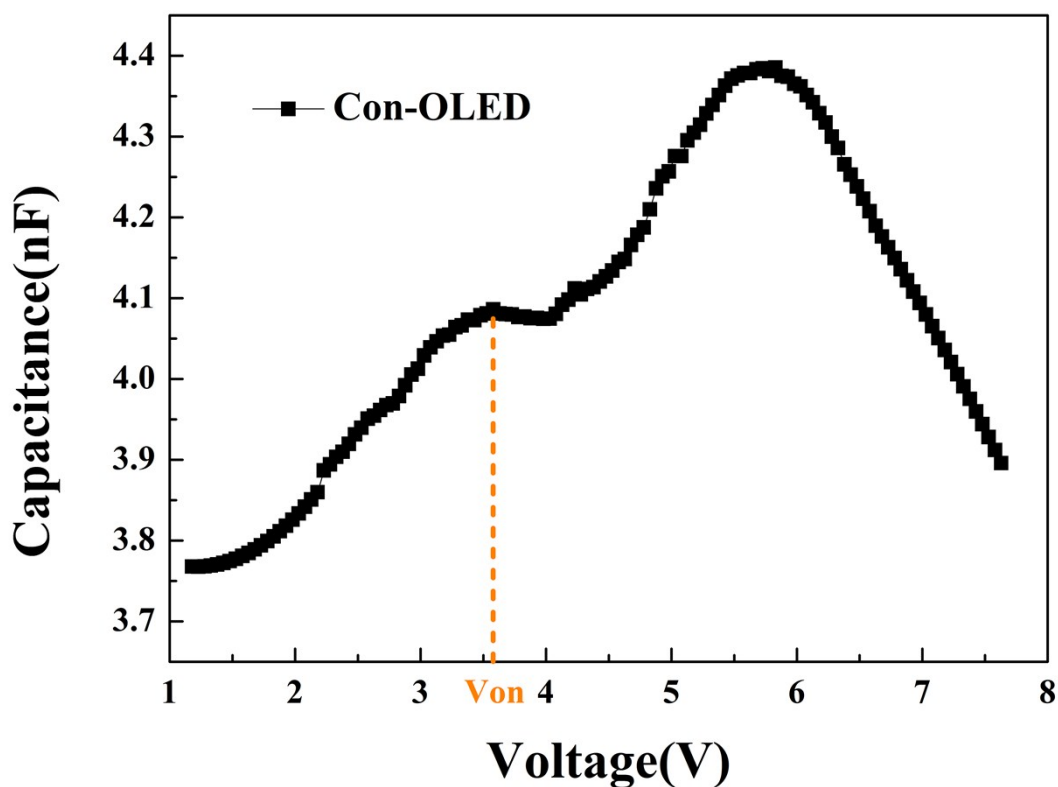

**Figure S4. The capacitance-voltage characteristic of Con-OLED.**
